# Supplementary material for: Regulation of MDA5-MAVS Antiviral Signaling Axis by TRIM25 through TRAF6-Mediated NF-κB Activation
Source: PubMed Central journal article supplement — Mol Cells. 2015 Aug 21;38(9):759–64. doi: 10.14348/molcells.2015.0047 (PMC4588718; doi:10.14348/molcells.2015.0047), 2015-08-21
Supplement: molce-38-9-759-supple.pdf [file molce-38-9-759-supple.pdf]

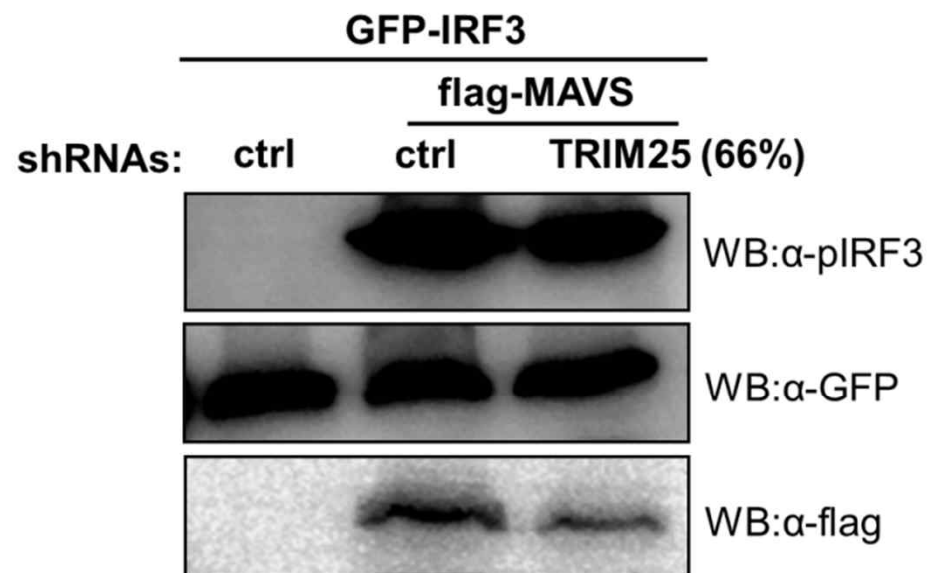

Supplementary Figure 1. Effect of TRIM25 depletion on MAVS-induced IRF3 phosphorylation. HEK293T cells were transfected with indicated plasmids and shRNAs and subjected to immunoblotting analysis. Knock-down efficiency of TRIM25 determined by RT-qPCR was around 66%.
